# Supplementary material for: A supercritical fluid chromatography method for the systematic toxicology analysis of cannabinoids and their metabolites
Source: Royal Society of Chemistry journal article supplement (doi:10.1039/c5ay01107h), 2015-01-01
Supplement: c5ay01107h1.pdf [file c5ay01107h1.pdf]

## Supercritical fluid chromatography method for the systematic toxicology analysis of cannabinoids and their metabolites

R. Geryk<sup>a</sup>, M. Švidrnoch<sup>b</sup>, A. Příbylka<sup>b</sup>, K. Kalíková<sup>a</sup>, V. Maier<sup>\*b</sup> and E. Tesařová<sup>a</sup>

### Supporting information

#### Experimental S1

##### Instrumentation

All SFC experiments were carried out on an Agilent 1260 Infinity Analytical SFC System (Waldbronn, Germany). The system consists of the following modules: Agilent 1260 Infinity SFC Control Module for CO<sub>2</sub> pre- and post-conditioning; Agilent 1260 Infinity SFC Binary Pump; Agilent 1260 Infinity degasser and autosampler; Agilent 1260 Infinity Column Compartment and Agilent 1260 Infinity Diode Array Detector with high pressure SFC flow cell. The system was controlled by Agilent OpenLab software. The Zorbax Rx-SIL column (150 mm x 4.6 mm i.d.), with particle size of 5 μm was obtained from Agilent Technologies (Waldbronn, Germany). Centrifuge Centro-8 was purchased from Letslab (Barcelona, Spain).

##### Material and methods

The carbon dioxide (CO<sub>2</sub>, 4.8 laser, used for SFC) was purchased from SIAD (Prague, Czech Republic). Acetonitrile (ACN, Chromasolv<sup>®</sup>, gradient grade, for HPLC, ≥ 99.9%), methanol (MeOH, LC-MS Ultra Chromasolv<sup>®</sup>, ≥ 99.9%), propane-2-ol (IPA, Chromasolv<sup>®</sup>, for HPLC, 99.9%) and β-glucuronidase (Type B-10, 10,000 units/mg) were supplied by Sigma-Aldrich (St. Louis, USA). Sodium acetate (CH<sub>3</sub>COONa, 99%) and ammonium acetate (CH<sub>3</sub>COONH<sub>4</sub>, 98-100%) were purchased from Lachema (Brno, Czech Republic). Chloroform (CHCl<sub>3</sub>, p.a.) was supplied by IPL (Uherský Brod, Czech Republic) and hydrochloric acid (HCl, 36%) was purchased from Analytika (Prague, Czech Republic). The deionized water was prepared by a water purification system 18 MΩ, Millipore (Molsheim, France). Solid-phase extraction cartridges, Supel<sup>™</sup>-Select SCX SPE Tube (1 mL x 30 mg), were supplied by Agilent Technologies (Waldbronn, Germany).

The analytes, AM-2201, AM-2201 M1, cannabidiol (CBD), JWH-018 6-hydroxyindole, JWH-018 *N*-(4-hydroxypentyl), JWH-018 *N*-pentanoic acid, JWH-019 5-hydroxyindole, JWH-019 *N*-(6-hydroxyhexyl), JWH-073, JWH-073 5-hydroxyindole, JWH-073 6-hydroxyindole, JWH-200, JWH-200 4-hydroxyindole, JWH-210 *N*-(5-carboxypentyl), JWH-250, RCS-4 *N*-4-hydroxypentyl and THC were acquired from LGC Standards (Teddington, United Kingdom) .

##### Separation conditions

The MPs composed of supercritical CO<sub>2</sub> containing ACN, MeOH or IPA as OMs were used for separation of the mixture of THC, CBD and a wide group of the SCs and their metabolites. The method optimization was performed to improve separation by fine tuning of the MP (the type and amount of the OM were considered) and by adjusting the flow rate, temperature and BP. The optimized conditions were as follows: Zorbax Rx-SIL column (150 mm x 4.6 mm i.d.), with particle size of 5 μm, MP composed of CO<sub>2</sub>/ACN 93/7 (v/v), flow rate 2.5 mL/min, column temperature 40 °C, BP 95 bars and UV detection at 210 nm. The injection volume was 5 μL. All measurements were performed in triplicates. The void volume was determined using the solvent peak. The identification of analytes was carried out by spiking with standards and by comparison of the DAD spectra using the wavelengths in the range from 200 nm to 400 nm. The detection wavelength used was 210 nm because the majority of the studied analytes exhibited absorption maximum at the given wavelength.

### **Sample extraction**

The salting out protocol was as follows: To 100  $\mu\text{L}$  of spiked urine was added 10  $\mu\text{L}$  of HCl (36%) and 200  $\mu\text{L}$  of ACN. The mixture was mixed by vortexing for 10 s. Then 50  $\mu\text{L}$  of  $\text{CH}_3\text{COONH}_4$  solution, as salting-out reagent (concentration 10 M), was added and vortexed for 10 s. The samples were centrifuged at 10,000 rpm for 3 minutes in microcentrifuge tubes. From the upper organic layer, 200  $\mu\text{L}$  were removed and transferred to a clean vial. The organic phase was evaporated by nitrogen stream. The dry residue was dissolved in 100  $\mu\text{L}$  MeOH.

In the case of real sample, to 1.0 mL of urine was added 100  $\mu\text{L}$  HCl (36%) and 2.0 mL ACN. The mixture was mixed by vortexing for 10 s. Then 500  $\mu\text{L}$  of  $\text{CH}_3\text{COONH}_4$  solution (10 M) was added and vortexed for 10 s. The sample was centrifuged at 10,000 rpm for 3 minutes. From the upper organic layer, 200  $\mu\text{L}$  were removed and transferred to a clean vial. The organic phase was evaporated by nitrogen stream. The dry residue was dissolved in 20  $\mu\text{L}$  MeOH.

Urine sample obtained from a patient after intoxication (smoking of herbal blend containing JWH-073) was enzymatically hydrolyzed by  $\beta$ -glucuronidase and extracted. 10 mL of urine (either blank urine or urine obtained from intoxicated patient), 6 mL of 2 M  $\text{CH}_3\text{COONa}$  solution, pH 4.50, and 2 mL of  $\beta$ -glucuronidase (about 10,000 units/mg) were mixed and heated at 60  $^\circ\text{C}$  for 1 hour. After hydrolysis the metabolites were extracted using the same extraction procedure as described above.

### **Standard and calibration samples preparation**

Drug free human urines were obtained from 8 healthy volunteers (of different sex and age). The urine samples were centrifuged at 3000 rpm for 10 min and filtered through 0.45  $\mu\text{m}$  nylon membrane. All these samples obtained from healthy volunteers were analyzed prior to their use for verification of drug-free status (negative urine).

Stock solutions of each analyte were prepared at a concentration of 1 mg/mL using MeOH as solvent and then diluted with MeOH to appropriate concentration. The samples for calibration were prepared in negative urine at the appropriate concentrations.

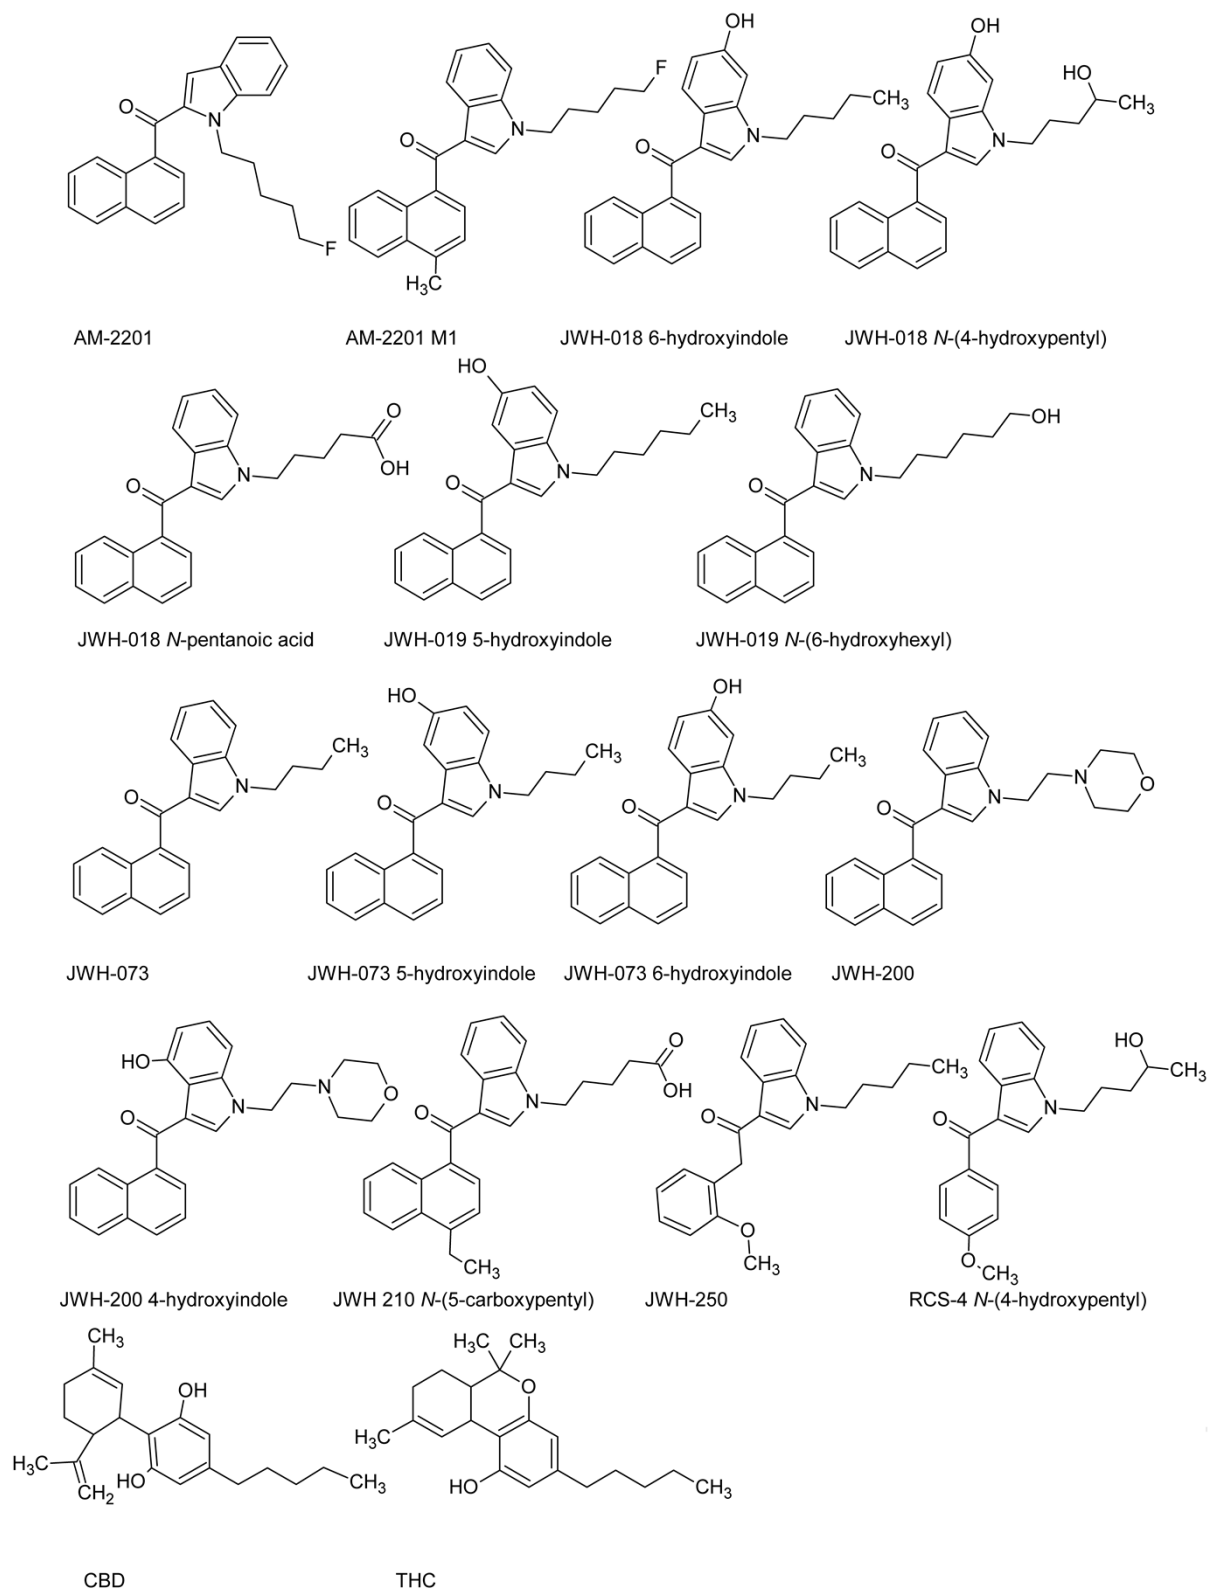

**Figure S1.** Chemical structures of the studied analytes.

**Table S1.** Precision data expressed as intra-day and inter-day repeatability RSD% of retention times ( $t_R$ ) and peak areas ( $A$ ).

| Analytes                                | Intra-day RSD%          |                         |                          |                         |                         |                          | Inter-day (3 days) RSD% |                         |
|-----------------------------------------|-------------------------|-------------------------|--------------------------|-------------------------|-------------------------|--------------------------|-------------------------|-------------------------|
|                                         | $t_R$                   |                         |                          | $A$                     |                         |                          | $t_R$                   | $A$                     |
|                                         | 3.0<br>$\mu\text{g/mL}$ | 5.0<br>$\mu\text{g/mL}$ | 10.0<br>$\mu\text{g/mL}$ | 3.0<br>$\mu\text{g/mL}$ | 5.0<br>$\mu\text{g/mL}$ | 10.0<br>$\mu\text{g/mL}$ | 5.0<br>$\mu\text{g/mL}$ | 5.0<br>$\mu\text{g/mL}$ |
| THC                                     | 0.01                    | 0.01                    | 0.01                     | 0.65                    | 1.61                    | 2.84                     | 0.01                    | 2.19                    |
| CBD                                     | 0.01                    | 0.01                    | 0.01                     | 0.91                    | 1.31                    | 1.67                     | 0.01                    | 1.69                    |
| JWH-250                                 | 0.01                    | 0.01                    | 0.01                     | 0.24                    | 1.57                    | 2.09                     | 0.02                    | 3.39                    |
| JWH-073                                 | 0.02                    | 0.03                    | 0.01                     | 0.33                    | 2.18                    | 2.94                     | 0.02                    | 3.95                    |
| AM-2201                                 | 0.02                    | 0.02                    | 0.01                     | 0.93                    | 3.82                    | 2.62                     | 0.02                    | 4.26                    |
| JWH-019 5-<br>hydroxyindole             | 0.02                    | 0.01                    | 0.01                     | 0.86                    | 3.15                    | 3.11                     | 0.01                    | 3.99                    |
| JWH-073 5-<br>hydroxyindole             | 0.01                    | 0.01                    | 0.01                     | 0.40                    | 3.41                    | 1.86                     | 0.01                    | 4.59                    |
| JWH-018 6-<br>hydroxyindole             | 0.03                    | 0.02                    | 0.01                     | 0.61                    | 1.40                    | 3.57                     | 0.04                    | 1.94                    |
| JWH-073 6-<br>hydroxyindole             | 0.02                    | 0.02                    | 0.01                     | 0.42                    | 0.95                    | 2.56                     | 0.03                    | 3.14                    |
| JWH-210 <i>N</i> -(5-<br>carboxypentyl) | 0.02                    | 0.02                    | 0.01                     | 0.17                    | 1.19                    | 2.36                     | 0.03                    | 1.39                    |
| JWH-018 <i>N</i> -<br>pentanoic acid    | 0.02                    | 0.02                    | 0.01                     | 3.17                    | 1.46                    | 3.83                     | 0.07                    | 2.06                    |
| AM-2201 M1                              | 0.02                    | 0.02                    | 0.07                     | 0.66                    | 1.52                    | 3.71                     | 0.03                    | 6.58                    |
| RCS-4 <i>N</i> -(4-<br>hydroxypentyl)   | 0.02                    | 0.02                    | 0.01                     | 0.12                    | 4.65                    | 3.04                     | 0.04                    | 5.98                    |
| JWH-018 <i>N</i> -(4-<br>hydroxypentyl) | 0.12                    | 0.15                    | 0.06                     | 0.22                    | 2.42                    | 1.42                     | 0.15                    | 6.35                    |
| JWH-019 <i>N</i> -(6-<br>hydroxyhexyl)  | 0.10                    | 0.10                    | 0.10                     | 0.45                    | 5.12                    | 3.82                     | 0.15                    | 6.30                    |
| JWH-200                                 | 0.13                    | 0.16                    | 0.13                     | 0.53                    | 1.91                    | 2.24                     | 0.18                    | 3.74                    |
| JWH-200 4-<br>hydroxyindole             | 0.10                    | 0.15                    | 0.07                     | 0.37                    | 2.57                    | 1.11                     | 0.19                    | 3.87                    |

**Table S2.** Chromatographic data of blank urine sample spiked with 5.0  $\mu\text{g/mL}$  working solution of analytes under optimized experimental conditions. MP composition:  $\text{CO}_2/\text{ACN}$  93/7 ( $v/v$ ); flow rate

2.5 mL/min; column temperature 40 °C; 95 bars as BP; UV detection at 210 nm, injection volume 5  $\mu$ L,  $t_R$ ; retention time,  $k$ ; retention factor,  $R_{1/2}$ ; resolution.

| Analytes                            | $t_R$ [min] | $k$   | $R_{1/2}$ |
|-------------------------------------|-------------|-------|-----------|
| THC                                 | 1.80        | 1.22  |           |
| CBD                                 | 2.05        | 1.53  | 2.87      |
| JWH-250                             | 2.50        | 2.08  | 4.63      |
| JWH-073                             | 2.79        | 2.44  | 2.77      |
| AM-2201                             | 3.40        | 3.20  | 4.99      |
| JWH-019 5-hydroxyindole             | 4.89        | 5.03  | 8.71      |
| JWH-073 5-hydroxyindole             | 5.26        | 5.48  | 1.83      |
| JWH-018 6-hydroxyindole             | 6.68        | 7.24  | 6.36      |
| JWH-073 6-hydroxyindole             | 7.04        | 7.68  | 1.41      |
| JWH-210 <i>N</i> -(5-carboxypentyl) | 7.41        | 8.14  | 1.32      |
| JWH-018 <i>N</i> -pentanoic acid    | 8.12        | 9.01  | 2.25      |
| AM-2201 M1                          | 8.98        | 10.08 | 2.77      |
| RCS-4 <i>N</i> -(4-hydroxypentyl)   | 9.37        | 10.56 | 1.36      |
| JWH-018 <i>N</i> -(4-hydroxypentyl) | 10.31       | 11.72 | 3.13      |
| JWH-019 <i>N</i> -(6-hydroxyhexyl)  | 11.19       | 12.79 | 2.45      |
| JWH-200                             | 11.82       | 13.57 | 1.65      |
| JWH-200 4-hydroxyindole             | 12.47       | 14.38 | 1.60      |

**Table S3.** Linearity and sensitivity parameters (n = 3, six point calibration method).

| Analytes                            | Regression line                      |                                         |                              | Sensitivity                         |                          |                          |
|-------------------------------------|--------------------------------------|-----------------------------------------|------------------------------|-------------------------------------|--------------------------|--------------------------|
|                                     | Linearity range [ $\mu\text{g/mL}$ ] | Slope [ $\text{mAU s mL}/\mu\text{g}$ ] | Intercept [ $\text{mAU s}$ ] | Coefficient of determination, $R^2$ | LOD [ $\mu\text{g/mL}$ ] | LOQ [ $\mu\text{g/mL}$ ] |
| THC                                 | 0.5-20.0                             | 6.982                                   | 1.056                        | 0.9997                              | 0.15                     | 0.50                     |
| CBD                                 | 0.5-20.0                             | 6.124                                   | 1.075                        | 0.9998                              | 0.15                     | 0.50                     |
| JWH-250                             | 0.5-20.0                             | 4.758                                   | -0.056                       | 0.9992                              | 0.15                     | 0.50                     |
| JWH-073                             | 0.5-20.0                             | 12.745                                  | -0.165                       | 0.9993                              | 0.15                     | 0.50                     |
| AM-2201                             | 0.5-20.0                             | 9.894                                   | 0.296                        | 0.9995                              | 0.15                     | 0.50                     |
| JWH-019 5-hydroxyindole             | 1.0-20.0                             | 7.957                                   | 0.311                        | 0.9996                              | 0.17                     | 0.57                     |
| JWH-073 5-hydroxyindole             | 1.0-20.0                             | 13.137                                  | -0.726                       | 0.9996                              | 0.18                     | 0.60                     |
| JWH-018 6-hydroxyindole             | 1.5-20.0                             | 7.325                                   | 0.523                        | 0.9997                              | 0.35                     | 1.17                     |
| JWH-073 6-hydroxyindole             | 1.0-20.0                             | 7.985                                   | 0.277                        | 0.9995                              | 0.25                     | 0.83                     |
| JWH-210 <i>N</i> -(5-carboxypentyl) | 1.5-20.0                             | 6.458                                   | 0.952                        | 0.9995                              | 0.33                     | 1.10                     |
| JWH-018 <i>N</i> -pentanoic acid    | 1.5-20.0                             | 9.428                                   | 0.034                        | 0.9997                              | 0.35                     | 1.17                     |
| AM-2201 M1                          | 1.0-20.0                             | 11.485                                  | 0.498                        | 0.9996                              | 0.26                     | 0.87                     |
| RCS-4 <i>N</i> -(4-hydroxypentyl)   | 2.0-20.0                             | 4.812                                   | 2.058                        | 0.9989                              | 0.50                     | 1.67                     |
| JWH-018 <i>N</i> -(4-hydroxypentyl) | 1.5-20.0                             | 13.973                                  | -1.519                       | 0.9997                              | 0.31                     | 1.03                     |
| JWH-019 <i>N</i> -(6-hydroxyhexyl)  | 2.0-20.0                             | 8.258                                   | 0.489                        | 0.9995                              | 0.52                     | 1.73                     |
| JWH-200                             | 1.5-20.0                             | 10.078                                  | -0.989                       | 0.9996                              | 0.36                     | 1.20                     |
| JWH-200 4-hydroxyindole             | 2.0-20.0                             | 8.210                                   | 2.451                        | 0.9980                              | 0.52                     | 1.73                     |

**Table S4.** Mean recovery data.

| Analytes                            | Recovery% |            | RSD%      |            |
|-------------------------------------|-----------|------------|-----------|------------|
|                                     | 5.0 µg/mL | 10.0 µg/mL | 5.0 µg/mL | 10.0 µg/mL |
| THC                                 | 124.3     | 87.7       | 2.90      | 4.75       |
| CBD                                 | 108.1     | 77.2       | 1.57      | 2.76       |
| JWH-250                             | 99.1      | 91.9       | 3.45      | 1.86       |
| JWH-073                             | 100.3     | 78.1       | 5.38      | 2.00       |
| AM-2201                             | 103.0     | 75.5       | 4.27      | 1.84       |
| JWH-019 5-hydroxyindole             | 106.5     | 71.2       | 3.99      | 3.39       |
| JWH-073 5-hydroxyindole             | 100.3     | 75.6       | 4.59      | 0.90       |
| JWH-018 6-hydroxyindole             | 96.2      | 89.7       | 1.94      | 3.43       |
| JWH-073 6-hydroxyindole             | 98.8      | 74.6       | 3.14      | 2.49       |
| JWH-210 <i>N</i> -(5-carboxypentyl) | 76.6      | 93.8       | 1.39      | 1.66       |
| JWH-018 <i>N</i> -pentanoic acid    | 82.1      | 86.4       | 2.06      | 4.41       |
| AM-2201 M1                          | 97.1      | 85.4       | 6.66      | 3.44       |
| RCS-4 <i>N</i> -(4-hydroxypentyl)   | 96.2      | 75.2       | 4.65      | 2.75       |
| JWH-018 <i>N</i> -(4-hydroxypentyl) | 111.4     | 92.6       | 6.35      | 4.41       |
| JWH-019 <i>N</i> -(6-hydroxyhexyl)  | 108.4     | 96.9       | 2.03      | 4.94       |
| JWH-200                             | 74.2      | 80.9       | 3.74      | 4.43       |
| JWH-200 4-hydroxyindole             | 91.3      | 89.5       | 2.57      | 4.29       |

The recoveries were calculated as the ratio of blank urine samples spiked with all analytes before and after the extraction step.
